# Supplementary material for: Total Phenolics and Anthocyanins Contents and Antioxidant Activity in Four Different Aerial Parts of Leafy Sweet Potato (Ipomoea batatas L.)
Source: MDPI journal article supplement (doi:10.3390/molecules27103117), 2022-05-12
Supplement: s1 [file s1]

# Supplementary Material

**Table S1.** Agronomic traits of different leafy sweet potato varieties.

| variety  | Plant type | Parietal color | Leaf shape             | Vein color | Vine color | Vine tip pubes-<br>ence | Vine tip color |
|----------|------------|----------------|------------------------|------------|------------|-------------------------|----------------|
| GSC-2    | semi-erect | green          | acuminate-cor-<br>date | green      | green      | none                    | green          |
| GCS-5    | semi-erect | green          | incised                | green      | green      | none                    | green          |
| Ziyang   | semi-erect | purple         | cordate                | purple     | purple     | none                    | purple         |
| GS-15-28 | semi-erect | light purple   | acuminate-cor-<br>date | purple     | purple     | none                    | purple         |
| GS-16-11 | semi-erect | purple         | incised                | purple     | purple     | none                    | purple         |
| GS-17-3  | semi-erect | yellow green   | incised                | purple     | purple     | none                    | purple         |
| GS-17-5  | semi-erect | yellow green   | acuminate-cor-<br>date | purple     | purple     | none                    | purple         |
| GS-17-10 | semi-erect | light purple   | incised                | purple     | purple     | none                    | purple         |
| GS-17-21 | semi-erect | light purple   | cordate                | purple     | purple     | none                    | purple         |
| GS-17-22 | semi-erect | purple         | acuminate-cor-<br>date | purple     | purple     | none                    | purple         |
| GS-17-23 | semi-erect | light green    | acuminate-cor-<br>date | purple     | purple     | none                    | purple         |
